# Supplementary material for: Detection of aldehydes by gold nanoparticle colorimetric array based on Tollens' reagent
Source: Royal Society of Chemistry journal article supplement (doi:10.1039/d1ay01431e), 2021-01-01
Supplement: d1ay01431e1.pdf [file d1ay01431e1.pdf]

### Supporting information

**Table.S1** Specificity and accuracy of each analyte obtained from the cross-validation model

| Analytes         | Abbr.  | Sensitivity (%) | Specificity (%) | Accuracy (%) |
|------------------|--------|-----------------|-----------------|--------------|
| Formaldehyde     | ForA   | 100             | 100             | 100          |
| Acetaldehyde     | AceA   | 100             | 100             | 100          |
| Butyraldehyde    | ButA   | 100             | 100             | 100          |
| isobutyraldehyde | iButA  | 100             | 100             | 100          |
| Pentanal         | PentaA | 100             | 100             | 100          |
| Glutaraldehyde   | GluA   | 50              | 100             | 95           |
| Caproaldehyde    | CapA   | 100             | 100             | 100          |
| Heptaldehyde     | HepA   | 100             | 100             | 100          |
| Furaldehyde      | FurA   | 100             | 100             | 100          |
| Benzaldehyde     | BenzA  | 100             | 88              | 90           |

The leave-one-out method<sup>1</sup>, as a kind of cross-validation model, was performed to calculate quantitatively the accuracy of the performance of sensor. The accuracy of recognition was one of the most important norms, and results were showed in table S1. To all the analytes, the accuracy of aldehydes is over 90%, and the specificity of aldehydes is over 88%.

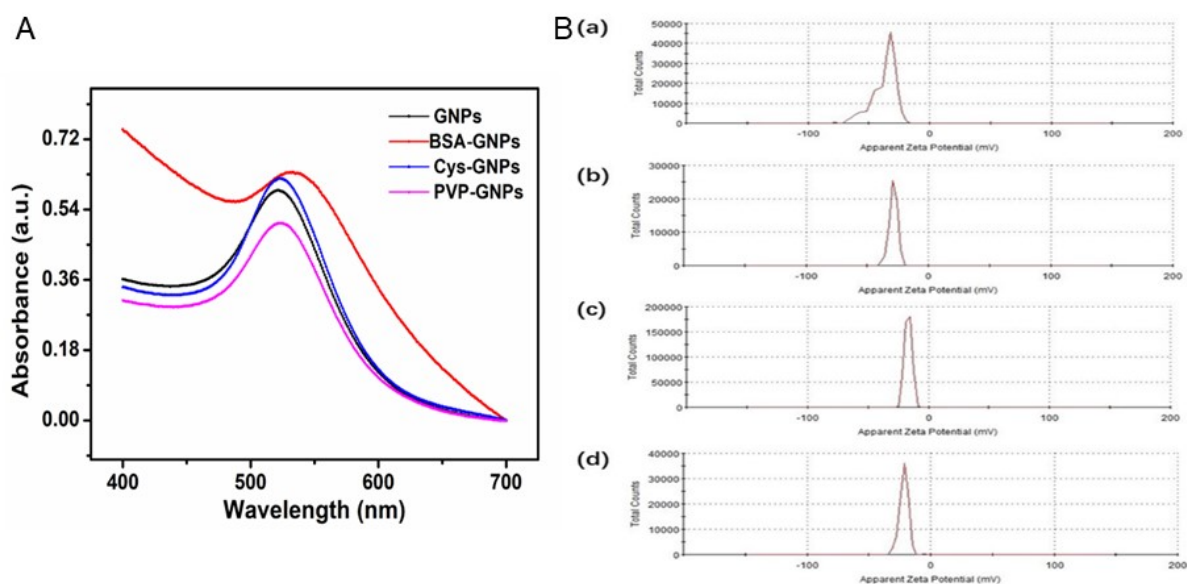

**Fig.S1** (A) UV-Vis spectrum of gold nanoparticles modified with different ligands. (B) Zeta potential of gold nanoparticles modified with different ligands: (a) GNP; (b) Cys-GNP; (c) PVP- GNP; (d) BSA- GNP

All the absorption peaks of GNPs located in the range of 520~531 nm. The absorption peak of GNP at 522 nm. The absorption peak of BSA-GNP at 531nm. The absorption peak of Cys-GNP at 523nm. The absorption peak of PVP-GNP at 520 nm. The surface of GNP shows negative charge when Cys, PVP, and BSA were chosen as the ligands.

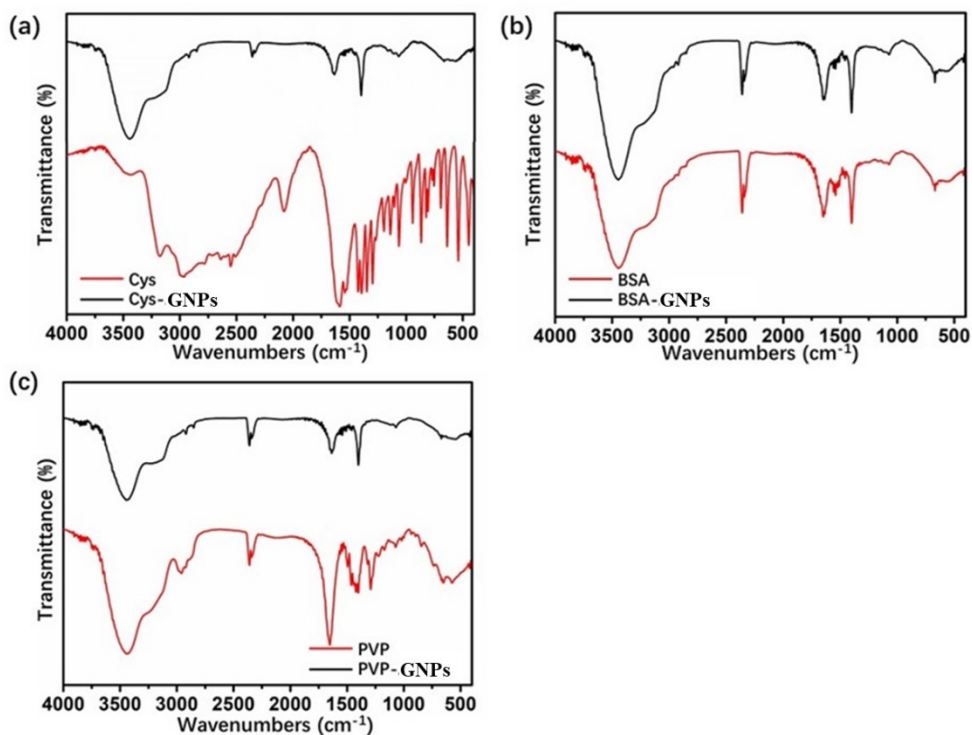

**Fig.S2** FT-IR spectra of different ligands and GNPs modified with different ligands

The shows the FT-IR spectra for different ligands and GNPs modified with different ligands (Fig.S1). The main bands in BSA spectrum are in the range of 3000  $\text{cm}^{-1}$  to 3400  $\text{cm}^{-1}$  for the O-H stretching vibrations, 1647  $\text{cm}^{-1}$  for C=O stretching vibrations and 1222  $\text{cm}^{-1}$  for C-N stretching vibrations. Two main absorption peaks in PVP spectrum are 1650 $\text{cm}^{-1}$  for C=O stretching vibration and 1298  $\text{cm}^{-1}$  which is due to and C-N stretching vibration<sup>2</sup>. The peaks at 1636  $\text{cm}^{-1}$  and 1400  $\text{cm}^{-1}$  are indicated the asymmetric and symmetric stretching vibrations of carboxylate. The broad band of Cys located in the range of 3000 to 3500  $\text{cm}^{-1}$  shows the  $\text{NH}_3^+$  stretching vibration and a weak band near 2551  $\text{cm}^{-1}$  corresponds to S-H vibrational band<sup>3</sup>.

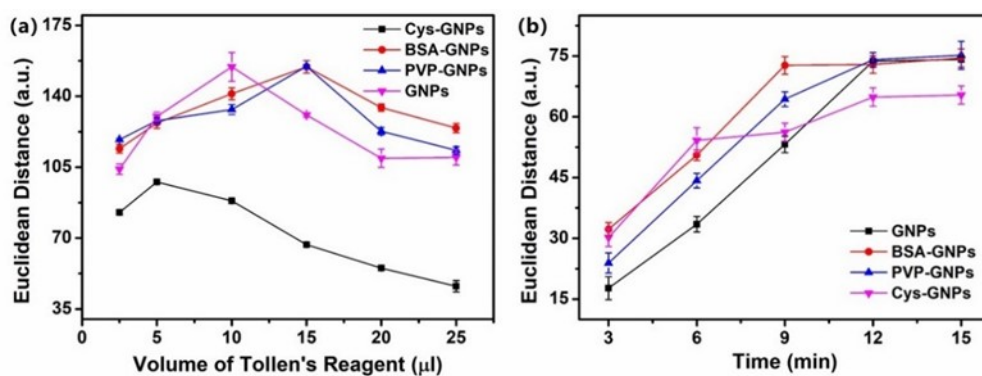

**Fig.S3** Euclidean distance of the array under different volumes of Tollens' reagent (a) and incubation time (b)

The optimal volume of Tollens' reagent for GNPs modified with different ligands is showed in Fig.S2a. In order to shorten the reaction time, time was optimized when the Euclidean distance reached a plateau at 60 °C (Fig.S2b). After reaction more than 12 min, the reaction intensity is the largest and reaches a plateau. We chose 12 min as the time to achieve stability of sensor arrays for the subsequent experiments.

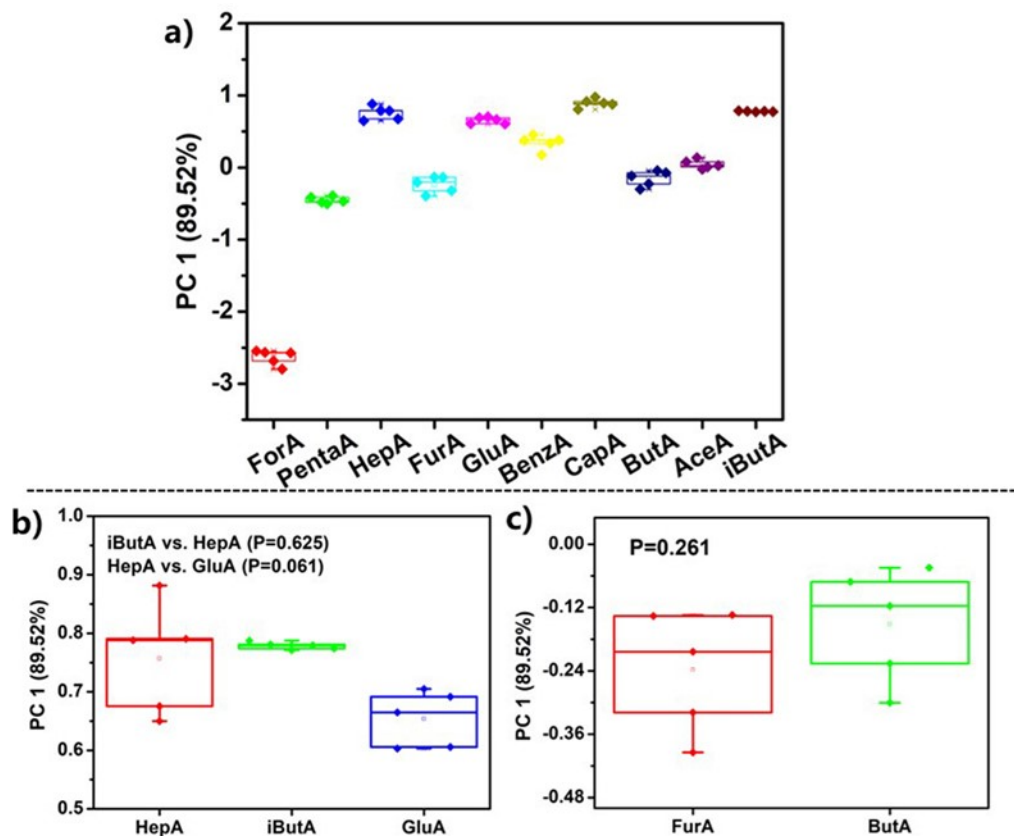

**Fig.S4** (a) Distribution of scores of the first-dimension principal components of ten aldehydes: Significant difference analysis based on the scores of the first-dimension principal components: (b) Isobutyraldehyde vs. heptaldehyde vs. glutaraldehyde; (c) Furfural vs. butyraldehyde

The PCA score plot of the ten aldehydes on the first-dimensional principal component was showed in Fig.S3a. Most of the aldehyde samples could be accurately discriminated based on the PC1. Therefore, t - test of independent sampler was evaluated to these aldehydes that was overlapped with others. But a significant difference analysis was not performed between isobutyraldehyde and heptaldehyde ( $p=0.625>0.05$ ), as well as heptaldehyde and glutaraldehyde ( $p=0.061>0.05$ ). Similarly, the significant difference between furfural and butyraldehyde were non-existent. Hence, better-optimized classification techniques, LDA was adopted to distinguish them in our consequent work.

Since the value of the variance of principal components provides information about contribution of a certain chemical property to discriminate samples<sup>4</sup>. The detection principle of our sensor to distinguish aldehydes is designed according to the reducibility

---

of aldehydes. Thus, we infer that the first PC indicates the diverse reducibility of different aldehydes.

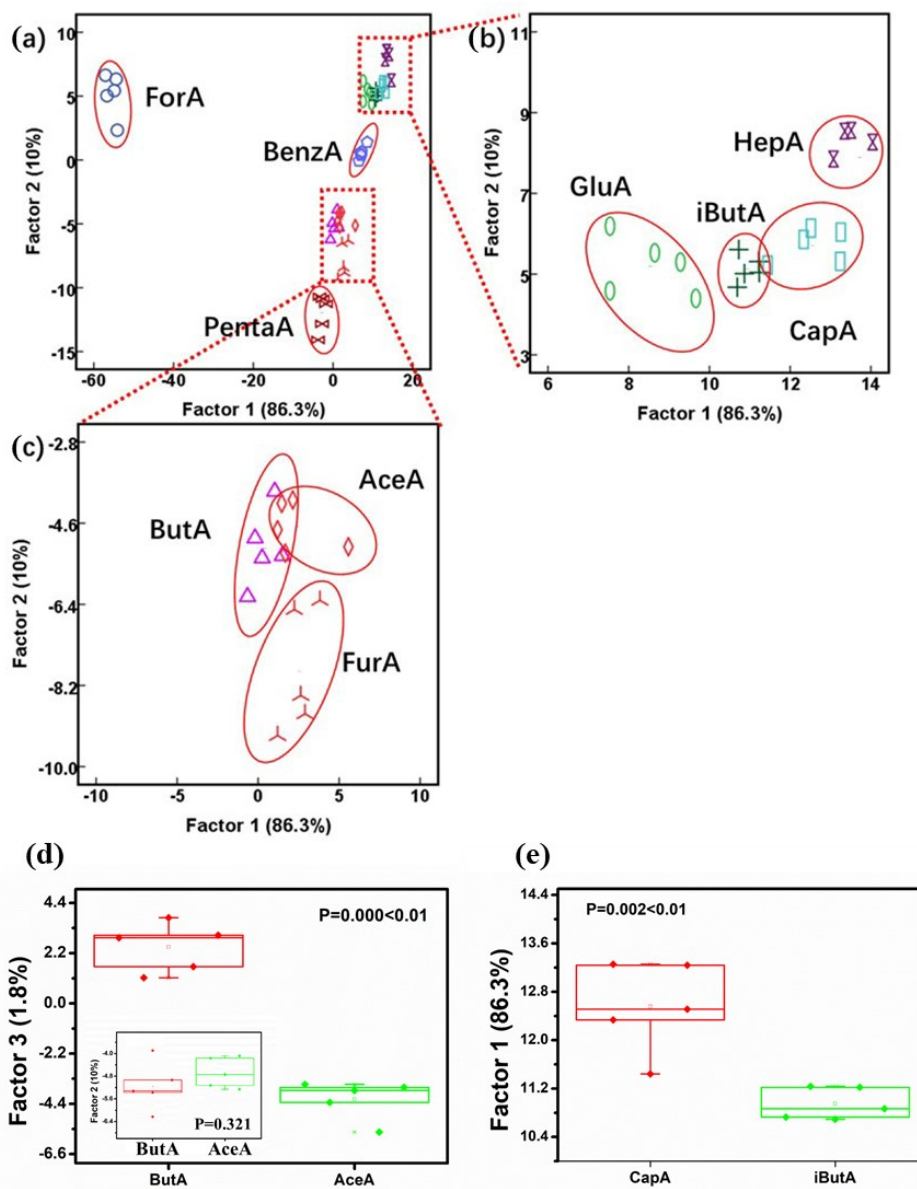

**Fig.S5** LDA discrimination results of ten aldehydes based on the first two-dimensional discrimination factors((a)(b) and (c)). Significant difference analysis of the discriminant scores of butyraldehyde and acetaldehyde in the second dimension and third dimension (d); significant difference analysis of the discriminant scores of hexanal and isobutyraldehyde in the first dimension (e)

As a dimensional reduction method, LDA makes an excellent discrimination among analytes by generating several optimized orthogonal dimensions. Remarkably, most experimental samples were respectively classified into a single cluster accurately without any overlap (Fig.S4a). Unfortunately, there was still some mild overlapping that were two groups of butyraldehyde and acetaldehyde (Fig.S4c) as well as

---

caproaldehyde and isobutyraldehyde(Fig.S4b). There are two groups of analytes that show extreme significant differences respectively according to the t-test of the dimension of factor 3 ( $p=0.00<0.01$ ) and the dimension of factor 1 ( $p=0.002 < 0.01$ ), valeraldehyde and butyraldehyde (Fig.S4d) as well as, caproaldehyde and isobutyraldehyde (Fig.S4e). Hence, all each analyte could be discriminated by LDA.



---

## References

1. Y. Wang, X. Zhong, D. Huo, Y. Zhao, X. Geng, H. Fa, X. Luo, M. Yang and C. Hou, *Talanta*, 2019, **192**, 407-417.
2. V. A. Dhumale, R. K. Gangwar, S. S. Datar and R. B. Sharma, *Materials Express*, 2012, **2**, 311-318.
3. S. Aryal, B. K. C. Remant, N. Dharmaraj, N. Bhattarai, C. H. Kim and H. Y. Kim, *Spectroc. Acta Pt. A-Molec. Biomolec. Spectr.*, 2006, **63**, 160-163.
4. J. R. Askim, M. Mahmoudi and K. S. Suslick, *Chemical Society reviews*, 2013, **42**, 8649-8682.
